# Supplementary material
Source: HighWire-hosted journal article supplement (https://jnm.snmjournals.org/highwire/filestream/94339/field_highwire_adjunct_files/0/104133_Supplemental_Data.pdf)
Supplement: 104133_Supplemental_Data.pdf [file 104133_Supplemental_Data.pdf]

**Supplemental Table 1: Studies reporting utility of Post-Rx. 131-I SPECT-CT for evaluation of differentiated thyroid cancer**

| Author<br>Journal                     | No. Pts/Scans<br>Design | Setting<br>Indication                                             | Scan type<br>Activity        | Camera<br>CT settings                         | Site of Radioactivity Foci<br>Findings/Comments                                                                                                                                                                                                                                                                                                                                                                                                                                                                                                                  |
|---------------------------------------|-------------------------|-------------------------------------------------------------------|------------------------------|-----------------------------------------------|------------------------------------------------------------------------------------------------------------------------------------------------------------------------------------------------------------------------------------------------------------------------------------------------------------------------------------------------------------------------------------------------------------------------------------------------------------------------------------------------------------------------------------------------------------------|
| Ciappuccini R et al.<br>2011 EJE      | 170/170<br>Pros         | First RA<br>Routine                                               | Post-Rx I-131<br>0.9-4.8 GBq | Symbia T2                                     | Neck/distant; Follow-up: median, 29 months, range 1.5-4.5 years<br>Prognostic value of post-ablation SPECT-CT for recurrence was assessed in follow-up evaluation:<br>32 (19%) pts. had persistent/recurrent ds: 18 with nodal mets, 8 with distant mets and 6 with both<br>SPECT-CT was negative or equivocal in all patients free of disease at follow-up<br>SPECT-CT was positive in 78% and negative in 22% pts with persistent or recurrent disease<br>Post-ablation scintigraphy has 78% sensitivity and 100% specificity for predicting recurrent disease |
| Qiu Z et al<br>2010 Head & Neck; Pros | 561/<br>Pros            | First RA<br>RAI Rx for mets<br>Selected                           | Post-Rx I-131<br>3.7-7.4 GBq | Millenium Hawkeye<br>140 kV, 2.5 mAs          | Neck<br>SPECT-CT identified parapharyngeal metastases in 14/561 (2.5%) pts.<br>Parapharyngeal mets were associated with regional and/or distant mets                                                                                                                                                                                                                                                                                                                                                                                                             |
| Grewal et al.<br>2010 JNM             | 148/148<br>Retro        | First RA (74%)<br>Recurrent or<br>metastatic ds. (26%)<br>Routine | Post-Rx I-131<br>1.7-8 GBq   | Philips Precedence<br>120 kV, adjusted mAs/kg | Neck/distant<br>SPECT-CT changed N in 15% postsurgical pts and in 21% recurrence pts<br>SPECT-CT changed ATA risk classification in 7/109 (6.4%) pts<br>SPECT-CT identified non-iodine avid metastases in 32/148 (22%) pts<br>Size of nodal mets was measured on CT component of SPECT-CT<br>SPECT-CT avoided additional imaging in 48% pts                                                                                                                                                                                                                      |
| Mustafa et al.<br>2010 EJNMMI         | 151/151<br>Pros         | First RA<br>Routine                                               | Post-Rx I-131<br>1.8-5.3 GBq | Symbia T2, T6<br>140 kV, 20-40 mAs            | Neck<br>Accuracy SPECT-CT > Planar in 24.5% pts<br>SPECT-CT revised N score in 24.5% pts<br>LNM occurs in 26% pts with T1 and 22% pts with microcarcinoma ( $\leq 1$ cm)                                                                                                                                                                                                                                                                                                                                                                                         |
| Schmidt et al.<br>2010 EJNMMI         | 81/81<br>Retro          | First RA<br>Routine                                               | Post-Rx I-131<br>1.5-5.3 GBq | Symbia T2, T6<br>140 kV, 40 mAs               | Neck<br>60/61 pts with negative SPECT-CT were disease free at 5 months<br>17/20 pts with positive SPECT-CT were disease free at 5 months<br>Metastasis size <0.9 ml predicted treatment success                                                                                                                                                                                                                                                                                                                                                                  |

|                                  |                |                                              |                              |                                        |                                                                                                                                                                                                                                                                                                |
|----------------------------------|----------------|----------------------------------------------|------------------------------|----------------------------------------|------------------------------------------------------------------------------------------------------------------------------------------------------------------------------------------------------------------------------------------------------------------------------------------------|
| Aide et al.<br>2009 JCEM         | 55/55<br>Pros  | First RA<br>Routine                          | Post-Rx I-131<br>2.9-4.0 GBq | Symbia T2<br>?kV, 60 mAs               | Neck<br>SPECT-CT clarified diagnosis in 16 pts with indeterminate planar scans:<br>9/9 pts without disease had negative SPECT-CT<br>4/5 pts with disease had positive SPECT-CT                                                                                                                 |
| Kohlfuerst et al.<br>2009 EJNMMI | 41/53<br>Pros  | First RA (23 pts)<br>FU (18 pts)<br>Selected | Post-Rx I-131<br>2.9-7.5 GBq | Symbia T<br>130 kV, 25mAs              | Neck/distant<br>SPECT-CT impact 21/33 (63.6%) pts, changed N score 12/33 (36.4%)<br>SPECT-CT impact 14/19 (73.7%) pts, change M score 4/19 (21.1%)<br>Changed treatment in 10/41 (24.4%) pts<br>8/33 (24.2%) changed treatment due to N score<br>2/19 (10.5%) changed treatment due to M score |
| Wang et al.<br>2009 Clin Imag    | 94/94<br>Retro | First RA<br>Routine                          | Post-Rx I-131<br>3.7-7.4 GBq | Infinia Hawkeye<br>140 kV, 2.5 mAs     | Neck/distant<br>Accuracy SPECT-CT > planar in 20/94 (21%) pts<br>Changed treatment in 22/94 (23%) pts<br>SPECT-CT identified unsuspected metastases in 7/94 (7%) pts                                                                                                                           |
| Schmidt et al.<br>2009 EJNMMI    | 57/57<br>Retro | First RA<br>Routine                          | Post-Rx I-131<br>1.5-5.3 GBq | Symbia T2, T6<br>140 kV, 40 mAs        | Neck<br>SPECT-CT completes N staging<br>SPECT-CT changed N score in 20/57 (35%) pts<br>SPECT-CT changed risk stratification in 14/57 (25%) pts                                                                                                                                                 |
| Chen et al.<br>2008 JNM          | 23/37<br>Pros  | First RA<br>Selected                         | Post-Rx I-131<br>3.7-7.4 GBq | Millenium Hawkeye<br>140 kV, 2.5 mAs   | Neck/distant<br>Incremental diagnostic value SPECT-CT > planar in 17/23 (74%) pts<br>SPECT-CT clarified 69/81 (85%) inconclusive planar foci<br>Changed treatment in 8/17 (47%) pts                                                                                                            |
| Tharp et al.<br>2004 EJNMMI      | 71/71<br>Retro | First RA (28/54)<br>FU (26/54)               | Post-Rx I-131<br>1.4-9.7 GBq | Millenium VG Hawkeye<br>140kV, 2.5 mAs | Neck/distant<br>Incremental diagnostic value SPECT-CT > planar in 41/71 (57%) pts                                                                                                                                                                                                              |

|                             |                |                      |                                                  |                                      |                                                                                                                      |
|-----------------------------|----------------|----------------------|--------------------------------------------------|--------------------------------------|----------------------------------------------------------------------------------------------------------------------|
|                             |                | Selected             | (54 pts)<br>Diagn. I-131<br>143–187 MBq (17 pts) |                                      | Diagnostic SPECT-CT changed treatment in 7/17 (41%) pts                                                              |
| Ruf et al.<br>2004 NMC      | 25/25<br>Pros  | First RA<br>Selected | Post-Rx I-131<br>3.7 GBq                         | Millenium Hawkeye<br>140 kV, 2.5 mAs | Neck/distant<br>SPECT-CT impact in 17/39 (44%) foci<br>Changed treatment in 6/24 (25%) pts                           |
| Yamamoto et al.<br>2003 JNM | 17/17<br>Retro | First RA<br>Routine  | Post-Rx I-131<br>3.7-7.4 GBq                     | Aquilon CT<br>Picker Prism           | Neck/distant<br>Accuracy SPECT-CT > SPECT 15/17 (88%) pts<br>Co-registration with external fiducial markers feasible |

---

Pts. = patients; ds. = disease; Retro = retrospective, Pros = prospective, First RA = post-surgery at time of first radioablation with I-131, FU = follow-up from post-surgery 6 months onwards, Routine = SPECT-CT performed on consecutive pts, Selected = SPECT-CT performed on selected pt group, Post-Rx = post-therapy scan, LNM = lymph node metastases, Sen = sensitivity, Spec = specificity

**Supplemental Table 2: Studies reporting utility of diagnostic pre-ablation SPECT-CT for evaluation of differentiated thyroid cancer**

| Author<br>Journal          | No. Pts/Scans<br>Design | Setting<br>Indication                       | Scan type<br>Activity                                                 | Camera<br>CT settings                                    | Site of Radioactivity Foci<br>Findings/Comments                                                                                                                                                                                                                                   |
|----------------------------|-------------------------|---------------------------------------------|-----------------------------------------------------------------------|----------------------------------------------------------|-----------------------------------------------------------------------------------------------------------------------------------------------------------------------------------------------------------------------------------------------------------------------------------|
| Wong et al.<br>2010 AJR    | 48/48<br>Retro          | First RA<br>Selected                        | Diagn. I-131<br>37 MBq                                                | Symbia T6<br>140kV, 100 mAs                              | Neck/distant<br>SPECT-CT changed TNM stage in 10/48 (21%) pts<br>SPECT-CT changed proposed I-131 dose selection in 28/48 (58%) pts<br>SPECT-CT identified unsuspected metastases in 4/8 pts with M1                                                                               |
| Barwick et al.<br>2010 EJE | 79/85<br>Retro          | FU<br>Routine                               | Diagn. I-123<br>350-400 MBq                                           | Millenium Hawkeye<br>140kV, 2.5 mAs                      | Neck/distant<br>Planar: Sen 41% Spec 68% Accuracy 61%<br>SPECT: Sen 45% Spec 89% Accuracy 78%<br>SPECT-CT: Sen 50% Spec 100% Accuracy 87%<br>SPECT-CT provided additional information in 42% pts and 70% foci                                                                     |
| Spanu et al.<br>2009 JNM   | 117/117<br>Pros         | First RA (8%)<br>FU (92%)<br>Routine        | Diagn. I-123<br>185 MBq (108 pts)<br>Post-Rx I-131<br>3.7 GBq (9 pts) | Millenium Hawkeye<br>Infinia Hawkeye 4<br>140kV, 2.5 mAs | Neck/distant<br>SPECT-CT has incremental value over planar scan in 67.8% pts<br>SPECT-CT changed treatment in 35.6% pts with disease<br>SPECT-CT led to avoidance of I-131 therapy in 20% pts without disease<br>SPECT-CT identified 158 foci compared to only 116 foci on planar |
| Wong et al.<br>2008 AJR    | 53/56<br>Retro          | First RA (47 pts)<br>FU (6 pts)<br>Selected | Diagn. I-131<br>37 MBq (47 pts)<br>150 MBq (6 pts)                    | Symbia T6<br>140kV, 100 mAs                              | Neck/distant<br>Diagnostic value SPECT-CT > planar in 53/130 (41%) neck foci<br>Diagnostic value SPECT-CT > planar in 17/17 (100%) distant foci<br>SPECT-CT using diagnostic I-131 activities feasible<br>Allows adjustment of prescribed radioiodine activity                    |

Pts. = patients; Retro = retrospective; Pros = prospective; First RA = post-surgery at time of first radioablation with I-131; FU = follow-up after surgery and initial radioablation, 6 months onwards; Routine = SPECT-CT performed on consecutive pts; Selected = SPECT-CT performed on selected pt group; Diagn. = diagnostic pre-ablation scan; Post-Rx = post-therapy scan; LNM = lymph node metastases, Sen = sensitivity, Spec = specificity
